# Supplementary material for: High-Throughput Identification of Organic Compounds from Polygoni Multiflori Radix Praeparata (Zhiheshouwu) by UHPLC-Q-Exactive Orbitrap-MS
Source: MDPI journal article supplement (doi:10.3390/molecules26133977), 2021-06-29
Supplement: s1 [file s1]

# High-Throughput Identification of Organic Compounds from *Polygoni Multiflori Radix Praeparata* (*Zhiheshouwu*) by UHPLC-Q-Exactive Orbitrap-MS

Shao-Yun Wang, Xiao-Zhu Sun, Shuo An, Fang Sang, Yun-Li Zhao \* and Zhi-Guo Yu \*

School of Pharmacy, Shenyang Pharmaceutical University, Shenyang 110016, Liaoning Province, P. R. China; wsy17862968828@163.com (S.-Y.W.); sxz13591173561@163.com (X.-Z.S.); a13831181394@163.com (S.A.); sang-fang03@163.com (F.S.)

\* Correspondence: yunli76@163.com (Y.-L.Z.); zhiguo-yu@163.com (Z.-G.Y.)

|                                                                                     |         |         |       |        |                                                                                     |                                                                                     |                                                                                      |      |      |      |                                                                                       |                                                                                       |                                                                                      |      |          |                  |      |  |
|-------------------------------------------------------------------------------------|---------|---------|-------|--------|-------------------------------------------------------------------------------------|-------------------------------------------------------------------------------------|--------------------------------------------------------------------------------------|------|------|------|---------------------------------------------------------------------------------------|---------------------------------------------------------------------------------------|--------------------------------------------------------------------------------------|------|----------|------------------|------|--|
| 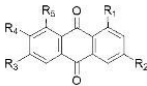   |         |         |       |        |                                                                                     |   |                                                                                      |      |      |      |                                                                                       |                                                                                       |                                                                                      |      |          |                  |      |  |
| Compound                                                                            | R1      | R2      | R3    | R4     | R5                                                                                  | Compound                                                                            | R1                                                                                   | R2   | R3   | R4   | R5                                                                                    | R6                                                                                    | R7                                                                                   |      |          |                  |      |  |
| Emodin-8-O-(6'-O-acetyl)-β-D-glucoside                                              | OH      | CH3     | OH    | H      | Glc-Ace                                                                             | Cirsimarin                                                                          | H                                                                                    | OH   | OCH3 | OCH3 | H                                                                                     | Glc                                                                                   | H                                                                                    |      |          |                  |      |  |
| Chrysophanol                                                                        | OH      | CH3     | H     | H      | OH                                                                                  | Liquiritigenin-glucoside-xy/ara                                                     | H                                                                                    | H    | H    | Xyl  | H                                                                                     | Glc                                                                                   | H                                                                                    |      |          |                  |      |  |
| Emodin-O-glucoside-gallate                                                          | Gallate | CH3     | OH    | H      | Glc                                                                                 | Hesperetin-7-O-glucoside                                                            | H                                                                                    | OH   | H    | Glc  | H                                                                                     | OCH3                                                                                  | OH                                                                                   |      |          |                  |      |  |
| 6-Carboxyl emodin                                                                   | OH      | CH2COOH | OH    | H      | OH                                                                                  | Epimedium                                                                           | H                                                                                    | OH   | H    | OH   | CH3                                                                                   | OH                                                                                    | H                                                                                    |      |          |                  |      |  |
| Physcion-8-O-β-D-glucoside                                                          | Glc     | OCH3    | CH3   | H      | OH                                                                                  | Kaempferol-3-β-D-glucoside                                                          | Glc                                                                                  | OH   | H    | OH   | H                                                                                     | OH                                                                                    | H                                                                                    |      |          |                  |      |  |
| Physcion                                                                            | OH      | OCH3    | CH3   | H      | OH                                                                                  | Quercetin                                                                           | OH                                                                                   | OH   | H    | OH   | H                                                                                     | OH                                                                                    | OH                                                                                   |      |          |                  |      |  |
| Citronosin                                                                          | OH      | CH2OH   | OH    | H      | OH                                                                                  | Kaempferol                                                                          | OH                                                                                   | OH   | H    | OH   | H                                                                                     | OH                                                                                    | H                                                                                    |      |          |                  |      |  |
| Quercetin                                                                           | OH      | CH2OH   | OH    | H      | OCH3                                                                                | Kaempferol-O-hexose-rhamnose                                                        | Glc                                                                                  | OH   | H    | Rha  | H                                                                                     | OH                                                                                    | H                                                                                    |      |          |                  |      |  |
| Hydroxyl-rhein                                                                      | OH      | COOH    | OH    | H      | OH                                                                                  | Dihydroquercetin                                                                    | OH                                                                                   | OH   | H    | OH   | H                                                                                     | OH                                                                                    | OH                                                                                   |      |          |                  |      |  |
| Digitolein                                                                          | OCH3    | OH      | CH2OH | H      | OH                                                                                  |    |                                                                                      |      |      |      |                                                                                       |    |                                                                                      |      |          |                  |      |  |
| Emodin-3-ethyl ether                                                                | OH      | OCH2CH3 | CH3   | H      | OH                                                                                  | Compound                                                                            | R1                                                                                   | R2   | R3   | R4   | R5                                                                                    | Compound                                                                              | R1                                                                                   | R2   | R3       |                  |      |  |
| 2-acetylmordin                                                                      | OH      | OH      | CH3   | COCH3  | OH                                                                                  | Gallate acid                                                                        | H                                                                                    | OH   | OH   | OH   | H                                                                                     | Catechin                                                                              | OH                                                                                   | OH   | OH       |                  |      |  |
| Emodin                                                                              | OH      | CH3     | OH    | H      | OH                                                                                  | Gallate acid-O-glucoside                                                            | H                                                                                    | OH   | OH   | Glc  | H                                                                                     | Acetyl-picatechin-O-glucoside                                                         | OH                                                                                   | Glc  | Acc      |                  |      |  |
| Emodin-8-O-β-D-glucoside                                                            | OH      | CH3     | OH    | H      | Glc                                                                                 | Dihydroxy-benzoic acid                                                              | OH                                                                                   | H    | H    | H    | OH                                                                                    | Epicatechin-O-gallate                                                                 | Gal                                                                                  | OH   | OH       |                  |      |  |
| Physcion-8-O-(6'-O-malonyl)-hexose                                                  | Glc-Mal | OCH3    | CH3   | H      | OH                                                                                  | Vanillic acid                                                                       | H                                                                                    | OCH3 | OH   | H    | H                                                                                     | Protocatechuic acid-O-glucoside                                                       | OH                                                                                   | OH   | OH       |                  |      |  |
| Citronosin-O-glucoside                                                              | OH      | CH2OH   | OH    | H      | Glc                                                                                 | Protocatechuic acid-O-glucoside                                                     | H                                                                                    | Glc  | OH   | H    | H                                                                                     | Veratric acid                                                                         | H                                                                                    | OCH3 | OCH3     |                  |      |  |
|    |         |         |       |        |                                                                                     | Veratric acid                                                                       | H                                                                                    | OCH3 | OCH3 | H    | H                                                                                     | Compound                                                                              | R1                                                                                   | R2   | Compound | R                |      |  |
| Compound                                                                            | R1      | R2      | R3    | R4     | R5                                                                                  | R6                                                                                  | 3-Hydroxybenzoic acid                                                                | H    | OH   | H    | H                                                                                     | H                                                                                     | Caffeic acid                                                                         | OH   | OH       | Gallate-glycerol | Gly  |  |
| 3,4,5,4'-tetrahydroxystilbene                                                       | H       | OH      | OH    | OH     | OH                                                                                  | H                                                                                   | 2-Methyl gallate                                                                     | CH3  | OH   | OH   | OH                                                                                    | OH                                                                                    | Coumaric acid                                                                        | H    | OH       | Syringic acid    | OCH3 |  |
| Rhapontin                                                                           | H       | OH      | H     | Glc    | OCH3                                                                                | OH                                                                                  | Syringic acid                                                                        | H    | OCH3 | OH   | OCH3                                                                                  | H                                                                                     |   |      |          |                  |      |  |
| Tetrahydroxystilbene-O-di-glucoside                                                 | Glc     | OH      | H     | Glc    | OH                                                                                  | H                                                                                   |     |      |      |      |                                                                                       |                                                                                       |    |      |          |                  |      |  |
| Resveratrol                                                                         | H       | OH      | H     | OH     | OH                                                                                  | H                                                                                   |    |      |      |      |                                                                                       |                                                                                       |   |      |          |                  |      |  |
| (Z)-2, 3, 5, 4'-                                                                    | Glc     | OH      | H     | OH     | OH                                                                                  | H                                                                                   |   |      |      |      |                                                                                       |                                                                                       |  |      |          |                  |      |  |
| Tetrahydroxystilbene-2-O-β-D-glucoside                                              | Mal     | OH      | H     | Glc    | OH                                                                                  | H                                                                                   |   |      |      |      |                                                                                       |                                                                                       |  |      |          |                  |      |  |
| 2,3,5,4'-Tetrahydroxystilbene-O-(malonyl)-β-D-glucoside                             | Glc     | OH      | H     | Gal    | OH                                                                                  | H                                                                                   |  |      |      |      |                                                                                       |                                                                                       |  |      |          |                  |      |  |
| Tetrahydroxystilbene-O-(galloyl)-glucoside                                          | H       | OH      | H     | Gal    | OH                                                                                  | H                                                                                   |  |      |      |      |                                                                                       |                                                                                       |  |      |          |                  |      |  |
| Piceatannol-3-O-β-D-(6'-O-galloyl)-glucoside                                        | H       | O-Glc   | H     | OH     | OH                                                                                  | H                                                                                   |  |      |      |      |                                                                                       |                                                                                       |  |      |          |                  |      |  |
| Tetrahydroxystilbene-O-(caffeoyl)-glucoside                                         | Glc     | OH      | H     | Caf    | OH                                                                                  | H                                                                                   |  |      |      |      |                                                                                       |                                                                                       |  |      |          |                  |      |  |
| Polydatin                                                                           | H       | O-Glc   | H     | OH     | OH                                                                                  | H                                                                                   |  |      |      |      |                                                                                       |                                                                                       |  |      |          |                  |      |  |
| Isorhapontigenin                                                                    | H       | OH      | H     | OH     | OH                                                                                  | H                                                                                   |  |      |      |      |                                                                                       |                                                                                       |  |      |          |                  |      |  |
| 2,3,5,4'-tetrahydroxystilbene-2-O-β-D-(2"-O-coumaroyl)-glucoside                    | Glc     | OH      | H     | OH     | OH                                                                                  | H                                                                                   |  |      |      |      |                                                                                       |                                                                                       |  |      |          |                  |      |  |
| 2,3,5,4'-tetrahydroxystilbene-2-O-(2"-O-acetyl)-β-D-glucoside                       | Cou     | OH      | H     | OH     | OH                                                                                  | H                                                                                   |  |      |      |      |                                                                                       |                                                                                       |  |      |          |                  |      |  |
| Tetrahydroxystilbene-2-(feruloyl)-glucoside                                         | Glc     | OH      | H     | Fer    | OH                                                                                  | H                                                                                   |  |      |      |      |                                                                                       |                                                                                       |  |      |          |                  |      |  |
|  |         |         |       |        |                                                                                     |  |                                                                                      |      |      |      |                                                                                       |  |                                                                                      |      |          |                  |      |  |
| Compound                                                                            | R1      | R2      | R3    | R4     |  |                                                                                     |                                                                                      |      |      |      |  |                                                                                       |                                                                                      |      |          |                  |      |  |
| Rumicapsoside D                                                                     | OH      | OH      | Glc   | CH2OH  |  |                                                                                     |                                                                                      |      |      |      |  |                                                                                       |                                                                                      |      |          |                  |      |  |
| Di-Emodin anthrone-Di-glucoside                                                     | Glc     | H       | H     | EA-Glc |  |                                                                                     |                                                                                      |      |      |      |  |                                                                                       |                                                                                      |      |          |                  |      |  |
| Chrysophanol anthrone                                                               | H       | H       | H     | CH3    |  |                                                                                     |                                                                                      |      |      |      |  |                                                                                       |                                                                                      |      |          |                  |      |  |
| Emodin anthrone                                                                     | OH      | OH      | H     | CH3    |  |                                                                                     |                                                                                      |      |      |      |  |                                                                                       |                                                                                      |      |          |                  |      |  |

**Figure S1.** Chemical structures of compounds identified in PMRP. Glc: glucoside; Mal: malonyl; Ace: acetyl; EA: Emodin anthrone; Gal: galloyl; Cou: coumaroyl; Fer: feruloyl; Caf: caffeoyl; Rha: rhamnose; Xyl: xylose; Gly: glycerol.
